# Supplementary material for: Hydrogel 3Din vitrotumor models for screening cell aggregation mediated drug response
Source: Royal Society of Chemistry journal article supplement (doi:10.1039/c9bm02075f), 2020-01-01
Supplement: c9bm02075f1.pdf [file c9bm02075f1.pdf]

# Supplementary Information

## Hydrogel 3D *In vitro* Tumor Models for Screening Cell Aggregation Mediated Drug Response

Maria Monteiro, Vítor M. Gaspar\*, Luís P. Ferreira, João F. Mano\*

*Department of Chemistry, CICECO – Aveiro Institute of Materials, University of Aveiro, Campus Universitário de Santiago, 3810-193, Aveiro, Portugal*

\*Corresponding authors:

Dr. Vítor Gaspar  
Department of Chemistry, CICECO – Aveiro Institute of Materials  
University of Aveiro, Campus Universitário de Santiago  
3810-193, Aveiro, Portugal  
E-mail: [vm.gaspar@ua.pt](mailto:vm.gaspar@ua.pt)  
Telephone: +351 234370733

Professor João F. Mano  
Department of Chemistry, CICECO – Aveiro Institute of Materials  
University of Aveiro, Campus Universitário de Santiago  
3810-193, Aveiro, Portugal  
E-mail: [jmano@ua.pt](mailto:jmano@ua.pt)  
Telephone: +351 234370733

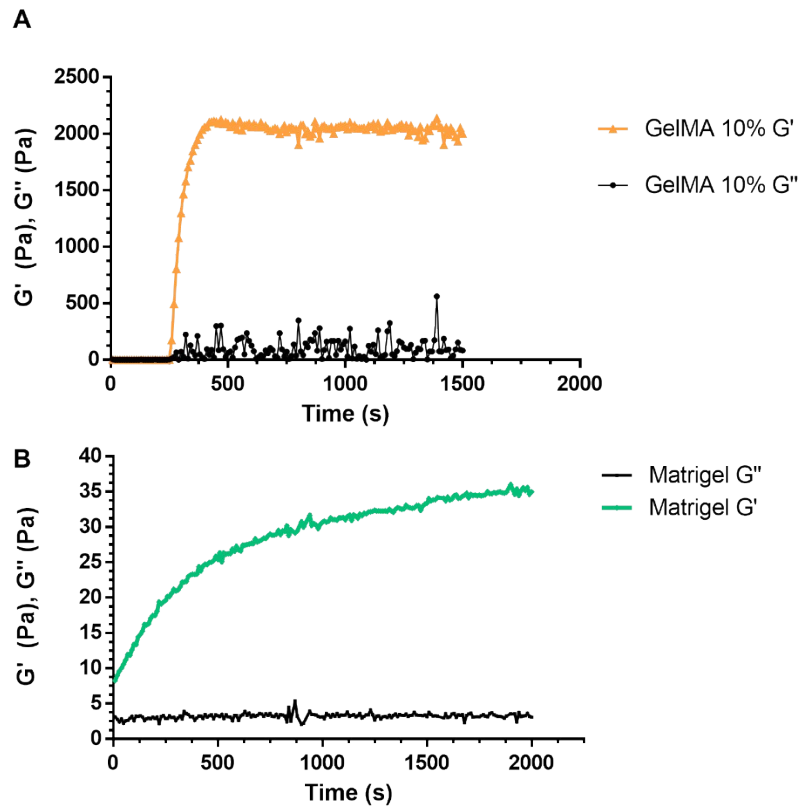

**Figure S1.** Rheological analysis of ECM-mimetic hydrogels. Representative curves for storage modulus ( $G'$ ) and loss modulus ( $G''$ ) for **(A)** GelMA 10% and **(B)** Matrigel<sup>TM</sup>.
